# Supplementary material for: Generation, contraction, and polarisation of Gaussian basis sets for atomic and molecular calculations using the generator coordinate method with polynomial discretisation: atoms from Na through Cl
Source: Royal Society of Chemistry journal article supplement (doi:10.1039/d1cp01879e), 2021-01-01
Supplement: d1cp01879e1.pdf [file d1cp01879e1.pdf]

**Supporting Information for:**

**Generation, contraction, and polarisation of Gaussian basis sets for  
atomic and molecular calculations using the generator coordinate  
method with polynomial discretization: atoms from Na through Cl**

Amanda R. Guimarães,<sup>a</sup> Rugles C. Barbosa,<sup>b</sup> Ana Cristina Mora Tello,<sup>a</sup> Aldineia P. da Silva,<sup>a</sup> Júlia M. A. Alves,<sup>a</sup> Milena Palhares Maringolo<sup>a</sup> and Albérico B. F. da Silva<sup>a</sup>

*<sup>a</sup>Departamento de Química e Física Molecular, Instituto de Química de São Carlos, Universidade de São Paulo, São Carlos, Brazil.*

*<sup>b</sup>Centro Regional de Ciências Nucleares do Centro Oeste a Nuclear – CRCN-CO, Abadia de Goiás – GO, Brazil*

E-mail: alberico@iqsc.usp.br; amd\_r\_g@hotmail.com

## Table of contents

|                                                                      |    |
|----------------------------------------------------------------------|----|
| SI. 1 pGCHF-4d2f1g basis sets for the from atoms Na through Cl ..... | 3  |
| SI.1.1 Sodium .....                                                  | 3  |
| SI.1.2 Magnesium .....                                               | 4  |
| SI.1.3 Aluminium .....                                               | 6  |
| SI.1.4 Silicon .....                                                 | 7  |
| SI.1.5 Phosphorus .....                                              | 9  |
| SI.1.6 Sulphur .....                                                 | 10 |
| SI.1.7 Chlorine .....                                                | 12 |
| SI. 2 Polarisation Exponents .....                                   | 14 |
| SI. 3 Geometries, Charge and Multiplicity .....                      | 15 |
| SI. 4 Total Energies .....                                           | 18 |
| SI. 5 Complete Basis Set Limit Extrapolations .....                  | 20 |
| SI. 6 Atomisation Energies .....                                     | 21 |
| Reference .....                                                      | 22 |

# SI. 1 pGCHF-4d2f1g<sub>(not contracted)</sub> basis sets for the from atoms Na through Cl

## SI.1.1 Sodium

Na 0

```

s 10 1.0
  0.4898333E+06      0.1356130E-04
  0.1041943E+06      0.6557761E-04
  0.2555346E+05      0.3686659E-03
  0.7122238E+04      0.1598320E-02
  0.2223793E+04      0.6362441E-02
  0.7667142E+03      0.2037996E-01
  0.2877296E+03      0.6030559E-01
  0.1158504E+03      0.1256414E+00
  0.4933134E+02      0.2116083E+00
  0.2189833E+02      0.3108046E-01
s 7 1.0
  0.2223793E+04      0.1964785E-04
  0.7667142E+03     -0.7007662E-04
  0.2877296E+03     -0.1508232E-03
  0.1158504E+03     -0.3229497E-02
  0.4933134E+02     -0.1027686E-01
  0.2189833E+02     -0.4391296E-01
  0.9988770E+01     -0.3056416E-01
s 6 1.0
  0.2877296E+03      0.1233270E-04
  0.1158504E+03      0.1265678E-04
  0.4933134E+02      0.1980961E-03
  0.2189833E+02      0.3696557E-03
  0.9988770E+01      0.1415959E-02
  0.4615050E+01     -0.2451400E-02
s 1 1.0
  2.12889607         1.0
s 1 1.0
  0.96648798         1.0
s 1 1.0
  0.42565009         1.0
s 1 1.0
  0.17925596         1.0
s 1 1.0
  0.071115565        1.0
s 1 1.0
  0.02624281         1.0
p 7 1.0
  0.2672449E+04      0.3242000E-04
  0.6881847E+03      0.2767800E-03
  0.2097861E+03      0.1879500E-02
  0.7394347E+02      0.9112720E-02

```

|      |               |               |
|------|---------------|---------------|
|      | 0.2943398E+02 | 0.3229470E-01 |
|      | 0.1292408E+02 | 0.8668710E-01 |
|      | 0.6114012E+01 | 0.1723980E+00 |
| p 1  | 1.0           |               |
|      | 3.04371808    | 1.0           |
| p 1  | 1.0           |               |
|      | 1.55743131    | 1.0           |
| p 1  | 1.0           |               |
|      | 0.80004565    | 1.0           |
| p 1  | 1.0           |               |
|      | 0.40299258    | 1.0           |
| p 1  | 1.0           |               |
|      | 0.19441546    | 1.0           |
| p 1  | 1.0           |               |
|      | 0.08773866    | 1.0           |
| d 1  | 1.0           |               |
|      | 1.09182426    | 1.0           |
| d 1  | 1.0           |               |
|      | 0.714188392   | 1.0           |
| d 1  | 1.0           |               |
|      | 0.584730897   | 1.0           |
| d 1  | 1.0           |               |
|      | 0.193148896   | 1.0           |
| f 1  | 1.0           |               |
|      | 0.583846756   | 1.0           |
| f 1  | 1.0           |               |
|      | 0.087738660   | 1.0           |
| g 1  | 1.0           |               |
|      | 0.265625      | 1.0           |
| **** |               |               |

### SI.1.2 Magnesium

|      |               |                |
|------|---------------|----------------|
| Mg 0 |               |                |
| s 10 | 1.0           |                |
|      | 0.6227681E+06 | 0.1270514E-04  |
|      | 0.1360048E+06 | 0.5854047E-04  |
|      | 0.3395530E+05 | 0.3198732E-03  |
|      | 0.9564278E+04 | 0.1369970E-02  |
|      | 0.2999530E+04 | 0.5435426E-02  |
|      | 0.1033656E+04 | 0.1763493E-01  |
|      | 0.3862654E+03 | 0.5289224E-01  |
|      | 0.1544714E+03 | 0.1151851E+00  |
|      | 0.6524214E+02 | 0.2007149E+00  |
|      | 0.2872046E+02 | 0.6591023E-01  |
| s 7  | 1.0           |                |
|      | 0.2999530E+04 | 0.1585334E-04  |
|      | 0.1033656E+04 | -0.6597863E-04 |
|      | 0.3862654E+03 | -0.1796865E-03 |
|      | 0.1544714E+03 | -0.3131163E-02 |
|      | 0.6524214E+02 | -0.1111602E-01 |
|      | 0.2872046E+02 | -0.4603704E-01 |

|     |               |                |
|-----|---------------|----------------|
|     | 0.1300479E+02 | -0.4090610E-01 |
| s 4 | 1.0           |                |
|     | 0.6524214E+02 | 0.1237367E-03  |
|     | 0.2872046E+02 | 0.2310344E-03  |
|     | 0.1300479E+02 | 0.1346105E-02  |
|     | 0.5977626E+01 | -0.1908151E-02 |
| s 1 | 1.0           |                |
|     | 2.75253886    | 1.0            |
| s 1 | 1.0           |                |
|     | 1.25309123    | 1.0            |
| s 1 | 1.0           |                |
|     | 0.55659818    | 1.0            |
| s 1 | 1.0           |                |
|     | 0.23805432    | 1.0            |
| s 1 | 1.0           |                |
|     | 0.09674998    | 1.0            |
| s 1 | 1.0           |                |
|     | 0.03687497    | 1.0            |
| p 7 | 1.0           |                |
|     | 0.4861677E+04 | 0.1636000E-04  |
|     | 0.1298184E+04 | 0.1295900E-03  |
|     | 0.4107481E+03 | 0.8388900E-03  |
|     | 0.1503329E+03 | 0.3986090E-02  |
|     | 0.6213288E+02 | 0.1439740E-01  |
|     | 0.2830920E+02 | 0.4062294E-01  |
|     | 0.1388104E+02 | 0.9328451E-01  |
| p 1 | 1.0           |                |
|     | 7.15080431    | 1.0            |
| p 1 | 1.0           |                |
|     | 3.77811916    | 1.0            |
| p 1 | 1.0           |                |
|     | 1.99863818    | 1.0            |
| p 1 | 1.0           |                |
|     | 1.03342807    | 1.0            |
| p 1 | 1.0           |                |
|     | 0.50987492    | 1.0            |
| p 1 | 1.0           |                |
|     | 0.23433337    | 1.0            |
| d 1 | 1.0           |                |
|     | 0.931646755   | 1.0            |
| d 1 | 1.0           |                |
|     | 0.419053857   | 1.0            |
| d 1 | 1.0           |                |
|     | 0.281076610   | 1.0            |
| d 1 | 1.0           |                |
|     | 0.0943541977  | 1.0            |
| f 1 | 1.0           |                |
|     | 0.333840821   | 1.0            |
| f 1 | 1.0           |                |
|     | 0.134186367   | 1.0            |
| g 1 | 1.0           |                |

0.017484018 1.0  
\*\*\*\*

### SI.1.3 Aluminium

Al 0

|          |               |                |
|----------|---------------|----------------|
| s 10 1.0 | 0.2545875E+07 | 0.2002485E-05  |
|          | 0.4101530E+06 | 0.2150549E-04  |
|          | 0.7993728E+05 | 0.1536086E-03  |
|          | 0.1850382E+05 | 0.8417600E-03  |
|          | 0.4994549E+04 | 0.3884870E-02  |
|          | 0.1543361E+04 | 0.1445681E-01  |
|          | 0.5360306E+03 | 0.4581785E-01  |
|          | 0.2054358E+03 | 0.1083070E+00  |
|          | 0.8529850E+02 | 0.1908434E+00  |
|          | 0.3767030E+02 | 0.1108153E+00  |
| s 6 1.0  | 0.1543361E+04 | -0.4105745E-04 |
|          | 0.5360306E+03 | -0.2836314E-03 |
|          | 0.2054358E+03 | -0.2635687E-02 |
|          | 0.8529850E+02 | -0.1165820E-01 |
|          | 0.3767030E+02 | -0.4370875E-01 |
|          | 0.1737254E+02 | -0.6116801E-01 |
| s 4 1.0  | 0.8529850E+02 | 0.9912466E-04  |
|          | 0.3767030E+02 | 0.2277114E-03  |
|          | 0.1737254E+02 | 0.1477573E-02  |
|          | 0.8213878E+01 | -0.9864054E-03 |
| s 1 1.0  | 3.90901748    | 1.0            |
| s 1 1.0  | 1.83838085    | 1.0            |
| s 1 1.0  | 0.83881437    | 1.0            |
| s 1 1.0  | 0.36456311    | 1.0            |
| s 1 1.0  | 0.14817333    | 1.0            |
| s 1 1.0  | 0.05529321    | 1.0            |
| p 6 1.0  | 0.2221656E+04 | 0.1034234E-03  |
|          | 0.4791056E+03 | 0.1303645E-02  |
|          | 0.1333547E+03 | 0.8203756E-02  |
|          | 0.4592131E+02 | 0.3594942E-01  |
|          | 0.1875234E+02 | 0.6744974E-01  |
|          | 0.8704381E+01 | 0.1362460E+00  |
| p 3 1.0  | 0.1875234E+02 | -0.5216766E-03 |
|          | 0.8704381E+01 | -0.8895048E-03 |
|          | 0.4402182E+01 | -0.4071342E-02 |

|     |              |     |  |
|-----|--------------|-----|--|
| p 1 | 1.0          |     |  |
|     | 2.32515511   | 1.0 |  |
| p 1 | 1.0          |     |  |
|     | 1.22940787   | 1.0 |  |
| p 1 | 1.0          |     |  |
|     | 0.62374401   | 1.0 |  |
| p 1 | 1.0          |     |  |
|     | 0.29106460   | 1.0 |  |
| p 1 | 1.0          |     |  |
|     | 0.11974330   | 1.0 |  |
| p 1 | 1.0          |     |  |
|     | 0.04162920   | 1.0 |  |
| d 1 | 1.0          |     |  |
|     | 3.23658096   | 1.0 |  |
| d 1 | 1.0          |     |  |
|     | 0.412467132  | 1.0 |  |
| d 1 | 1.0          |     |  |
|     | 0.144817836  | 1.0 |  |
| d 1 | 1.0          |     |  |
|     | 0.0288277721 | 1.0 |  |
| f 1 | 1.0          |     |  |
|     | 0.414916298  | 1.0 |  |
| f 1 | 1.0          |     |  |
|     | 0.176224365  | 1.0 |  |
| g 1 | 1.0          |     |  |
|     | 0.04371066   | 1.0 |  |

\*\*\*\*

#### Sl.1.4 Silicon

Si 0

|      |               |                |  |
|------|---------------|----------------|--|
| s 10 | 1.0           |                |  |
|      | 0.7143202E+06 | 0.1633552E-04  |  |
|      | 0.1423194E+06 | 0.8705522E-04  |  |
|      | 0.3336316E+05 | 0.4921341E-03  |  |
|      | 0.9058851E+04 | 0.2204770E-02  |  |
|      | 0.2804488E+04 | 0.8457510E-02  |  |
|      | 0.9744958E+03 | 0.2629126E-01  |  |
|      | 0.3741311E+03 | 0.6707160E-01  |  |
|      | 0.1562271E+03 | 0.1139539E+00  |  |
|      | 0.6984727E+02 | 0.9620584E-01  |  |
|      | 0.3291351E+02 | -0.1397293E+00 |  |
| s 7  | 1.0           |                |  |
|      | 0.2804488E+04 | -0.4681528E-05 |  |
|      | 0.9744958E+03 | -0.1602222E-03 |  |
|      | 0.3741311E+03 | -0.1038003E-02 |  |
|      | 0.1562271E+03 | -0.6333114E-02 |  |
|      | 0.6984727E+02 | -0.2189089E-01 |  |
|      | 0.3291351E+02 | -0.5255652E-01 |  |
|      | 0.1609171E+02 | -0.2364386E-01 |  |
| s 5  | 1.0           |                |  |

|   |               |                |
|---|---------------|----------------|
|   | 0.1562271E+03 | -0.1266937E-04 |
|   | 0.6984727E+02 | 0.4175153E-04  |
|   | 0.3291351E+02 | 0.2973784E-03  |
|   | 0.1609171E+02 | 0.1256452E-02  |
|   | 0.8035347E+01 | -0.1840957E-02 |
| s | 1 1.0         |                |
|   | 4.03416200    | 1.0            |
| s | 1 1.0         |                |
|   | 2.00456238    | 1.0            |
| s | 1 1.0         |                |
|   | 0.97045371    | 1.0            |
| s | 1 1.0         |                |
|   | 0.45059931    | 1.0            |
| s | 1 1.0         |                |
|   | 0.19753231    | 1.0            |
| s | 1 1.0         |                |
|   | 0.08048021    | 1.0            |
| p | 6 1.0         |                |
|   | 0.2290912E+04 | 0.1381968E-03  |
|   | 0.5575846E+03 | 0.1317044E-02  |
|   | 0.1663116E+03 | 0.8054759E-02  |
|   | 0.5886081E+02 | 0.3249050E-01  |
|   | 0.2393345E+02 | 0.6793096E-01  |
|   | 0.1082536E+02 | 0.8733102E-01  |
| p | 3 1.0         |                |
|   | 0.2393345E+02 | -0.4391745E-03 |
|   | 0.1082536E+02 | -0.1692494E-02 |
|   | 0.5273767E+01 | -0.4303293E-02 |
| p | 1 1.0         |                |
|   | 2.67931413    | 1.0            |
| p | 1 1.0         |                |
|   | 1.37446446    | 1.0            |
| p | 1 1.0         |                |
|   | 0.68934022    | 1.0            |
| p | 1 1.0         |                |
|   | 0.32727056    | 1.0            |
| p | 1 1.0         |                |
|   | 0.14240869    | 1.0            |
| p | 1 1.0         |                |
|   | 0.05499273    | 1.0            |
| d | 1 1.0         |                |
|   | 0.904553017   | 1.0            |
| d | 1 1.0         |                |
|   | 0.621886307   | 1.0            |
| d | 1 1.0         |                |
|   | 0.403477544   | 1.0            |
| d | 1 1.0         |                |
|   | 0.141405216   | 1.0            |
| f | 1 1.0         |                |
|   | 0.561999803   | 1.0            |
| f | 1 1.0         |                |

```

    0.198649753      1.0
g 1 1.0
    0.055563128      1.0
****

```

SI.1.5 Phosphorus

```

P 0
s 10 1.0
    0.9262659E+06      0.1272179E-04
    0.1951874E+06      0.6624560E-04
    0.4765239E+05      0.3629980E-03
    0.1328932E+05      0.1578900E-02
    0.4174210E+04      0.6128680E-02
    0.1456021E+04      0.1933267E-01
    0.5560980E+03      0.5425340E-01
    0.2292944E+03      0.1078939E+00
    0.1006381E+03      0.1615061E+00
    0.4635821E+02      0.6115892E-03
s 6 1.0
    0.1456021E+04      -0.1255638E-03
    0.5560980E+03      -0.5670197E-03
    0.2292944E+03      -0.4523457E-02
    0.1006381E+03      -0.1599564E-01
    0.4635821E+02      -0.5380219E-01
    0.2209807E+02      -0.4942879E-01
s 5 1.0
    0.2292944E+03      -0.3492358E-04
    0.1006381E+03      0.2940961E-04
    0.4635821E+02      0.2555523E-04
    0.2209807E+02      0.1520548E-02
    0.1074766E+02      -0.1232743E-02
s 1 1.0
    5.25864625      1.0
s 1 1.0
    2.55212797      1.0
s 1 1.0
    1.21134504      1.0
s 1 1.0
    0.55441958      1.0
s 1 1.0
    0.24125863      1.0
s 1 1.0
    0.09841677      1.0
p 6 1.0
    0.3736314E+04      0.6939740E-04
    0.9612032E+03      0.5972235E-03
    0.2917867E+03      0.3873090E-02
    0.1019277E+03      0.1748461E-01
    0.3995711E+02      0.4756233E-01
    0.1714228E+02      0.6420530E-01
p 4 1.0

```

|     |               |                |
|-----|---------------|----------------|
|     | 0.1019277E+03 | -0.2171078E-04 |
|     | 0.3995711E+02 | -0.3245068E-03 |
|     | 0.1714228E+02 | -0.1809482E-02 |
|     | 0.7848999E+01 | -0.5070522E-02 |
| p 1 | 1.0           |                |
|     | 3.74049640    | 1.0            |
| p 1 | 1.0           |                |
|     | 1.80930443    | 1.0            |
| p 1 | 1.0           |                |
|     | 0.86628276    | 1.0            |
| p 1 | 1.0           |                |
|     | 0.40037918    | 1.0            |
| p 1 | 1.0           |                |
|     | 0.17419884    | 1.0            |
| p 1 | 1.0           |                |
|     | 0.06957916    | 1.0            |
| d 1 | 1.0           |                |
|     | 1.17119463    | 1.0            |
| d 1 | 1.0           |                |
|     | 0.913497416   | 1.0            |
| d 1 | 1.0           |                |
|     | 0.393173817   | 1.0            |
| d 1 | 1.0           |                |
|     | 0.148078849   | 1.0            |
| f 1 | 1.0           |                |
|     | 0.63482418    | 1.0            |
| f 1 | 1.0           |                |
|     | 0.235946343   | 1.0            |
| g 1 | 1.0           |                |
|     | 0.06413004    | 1.0            |

\*\*\*\*

### Sl.1.6 Sulphur

S 0

|      |               |                |
|------|---------------|----------------|
| s 10 | 1.0           |                |
|      | 0.1691437E+07 | 0.6702497E-05  |
|      | 0.3489173E+06 | 0.3784754E-04  |
|      | 0.8292252E+05 | 0.2218138E-03  |
|      | 0.2240663E+05 | 0.1008950E-02  |
|      | 0.6793686E+04 | 0.4146429E-02  |
|      | 0.2281025E+04 | 0.1399779E-01  |
|      | 0.8369917E+03 | 0.4294935E-01  |
|      | 0.3312451E+03 | 0.9812530E-01  |
|      | 0.1395359E+03 | 0.1796077E+00  |
|      | 0.6174489E+02 | 0.9202609E-01  |
| s 7  | 1.0           |                |
|      | 0.6793686E+04 | 0.3955853E-05  |
|      | 0.2281025E+04 | -0.5813238E-04 |
|      | 0.8369917E+03 | -0.3620891E-03 |
|      | 0.3312451E+03 | -0.3321269E-02 |

|     |               |                |
|-----|---------------|----------------|
|     | 0.1395359E+03 | -0.1511699E-01 |
|     | 0.6174489E+02 | -0.5965754E-01 |
|     | 0.2832474E+02 | -0.9820292E-01 |
| s 5 | 1.0           |                |
|     | 0.3312451E+03 | -0.8028954E-04 |
|     | 0.1395359E+03 | -0.2273390E-03 |
|     | 0.6174489E+02 | -0.1159805E-02 |
|     | 0.2832474E+02 | -0.4302790E-03 |
|     | 0.1329386E+02 | -0.7868441E-03 |
| s 1 | 1.0           |                |
|     | 6.29981264    | 1.0            |
| s 1 | 1.0           |                |
|     | 2.97485729    | 1.0            |
| s 1 | 1.0           |                |
|     | 1.38145724    | 1.0            |
| s 1 | 1.0           |                |
|     | 0.62260465    | 1.0            |
| s 1 | 1.0           |                |
|     | 0.26875817    | 1.0            |
| s 1 | 1.0           |                |
|     | 0.10966200    | 1.0            |
| p 6 | 1.0           |                |
|     | 0.4710680E+04 | 0.6696302E-04  |
|     | 0.1014892E+04 | 0.7922159E-03  |
|     | 0.2777730E+03 | 0.5740240E-02  |
|     | 0.9303360E+02 | 0.2567171E-01  |
|     | 0.3672959E+02 | 0.6010408E-01  |
|     | 0.1646513E+02 | 0.7503098E-01  |
| p 4 | 1.0           |                |
|     | 0.9303360E+02 | -0.4691408E-04 |
|     | 0.3672959E+02 | -0.6492905E-03 |
|     | 0.1646513E+02 | -0.2629402E-02 |
|     | 0.8072970E+01 | -0.6439642E-02 |
| p 1 | 1.0           |                |
|     | 4.17029844    | 1.0            |
| p 1 | 1.0           |                |
|     | 2.18631611    | 1.0            |
| p 1 | 1.0           |                |
|     | 1.12051378    | 1.0            |
| p 1 | 1.0           |                |
|     | 0.54078706    | 1.0            |
| p 1 | 1.0           |                |
|     | 0.23674818    | 1.0            |
| p 1 | 1.0           |                |
|     | 0.09056172    | 1.0            |
| d 1 | 1.0           |                |
|     | 3.16925652    | 1.0            |
| d 1 | 1.0           |                |
|     | 0.923015743   | 1.0            |
| d 1 | 1.0           |                |
|     | 0.441537301   | 1.0            |

```

d 1 1.0
  0.182988886      1.0
f 1 1.0
  0.819237322      1.0
f 1 1.0
  0.310170358      1.0
g 1 1.0
  0.714049587      1.0
****

```

### SI.1.7 Chlorine

```

Cl 0
s 12 1.0
  0.5056009E+07    -0.2029651E-06
  0.1075509E+07     0.1081171E-04
  0.2613588E+06     0.6115840E-04
  0.7174829E+05     0.2719700E-03
  0.2200250E+05     0.1116961E-02
  0.7453375E+04     0.3739412E-02
  0.2757967E+04     0.1205688E-01
  0.1102339E+04     0.2859425E-01
  0.4706145E+03     0.6569682E-01
  0.2122142E+03     0.5475885E-01
  0.9994870E+02     -0.2461237E-01
  0.4861922E+02     -0.5351394E+00
s 9 1.0
  0.2200250E+05     0.1387492E-05
  0.7453375E+04     -0.5084559E-05
  0.2757967E+04     0.5827268E-06
  0.1102339E+04     -0.2586041E-03
  0.4706145E+03     -0.8879656E-03
  0.2122142E+03     -0.6132987E-02
  0.9994870E+02     -0.1635996E-01
  0.4861922E+02     -0.4513035E-01
  0.2415469E+02     -0.1142071E-01
s 6 1.0
  0.4706145E+03     0.2769529E-04
  0.2122142E+03     0.4533757E-04
  0.9994870E+02     0.4654046E-03
  0.4861922E+02     0.1149294E-02
  0.2415469E+02     0.3224297E-02
  0.1211971E+02     -0.4133925E-02
s 1 1.0
  6.07316556      1.0
s 1 1.0
  3.00541428      1.0
s 1 1.0
  1.45242812      1.0
s 1 1.0
  0.67782974      1.0
s 1 1.0

```

|      |               |                |
|------|---------------|----------------|
|      | 0.30207644    | 1.0            |
| s 1  | 1.0           |                |
|      | 0.12712119    | 1.0            |
| p 8  | 1.0           |                |
|      | 0.7990193E+04 | 0.2943455E-04  |
|      | 0.2185107E+04 | 0.2240571E-03  |
|      | 0.6946005E+03 | 0.1437188E-02  |
|      | 0.2516878E+03 | 0.6844950E-02  |
|      | 0.1019464E+03 | 0.2396194E-01  |
|      | 0.4526703E+02 | 0.5997733E-01  |
|      | 0.2160780E+02 | 0.9958317E-01  |
|      | 0.1087366E+02 | 0.1097738E+00  |
| p 5  | 1.0           |                |
|      | 0.1019464E+03 | -0.6046455E-04 |
|      | 0.4526703E+02 | -0.5282800E-03 |
|      | 0.2160780E+02 | -0.2389362E-02 |
|      | 0.1087366E+02 | -0.5844593E-02 |
|      | 0.5657112E+01 | -0.1204547E-01 |
| p 1  | 1.0           |                |
|      | 2.98391211    | 1.0            |
| p 1  | 1.0           |                |
|      | 1.56483061    | 1.0            |
| p 1  | 1.0           |                |
|      | 0.80012263    | 1.0            |
| p 1  | 1.0           |                |
|      | 0.39117545    | 1.0            |
| p 1  | 1.0           |                |
|      | 0.17932067    | 1.0            |
| p 1  | 1.0           |                |
|      | 0.07558763    | 1.0            |
| d 1  | 1.0           |                |
|      | 4.95310633    | 1.0            |
| d 1  | 1.0           |                |
|      | 1.32077704    | 1.0            |
| d 1  | 1.0           |                |
|      | 0.589743149   | 1.0            |
| d 1  | 1.0           |                |
|      | 0.238081911   | 1.0            |
| f 1  | 1.0           |                |
|      | 1.05772972    | 1.0            |
| f 1  | 1.0           |                |
|      | 0.416529867   | 1.0            |
| g 1  | 1.0           |                |
|      | 0.8263684     | 1.0            |
| **** |               |                |

## Sl. 2 Polarisation Exponents

Table Sl. 2 Polarisation exponents optimised via CISD. The second d exponents (the first for the Mg atom) of the pGCHF-3d2f+d sets were “pinched” from the p uncontracted set of exponents.

| pGCHF-2d1f                           |                    |                    |                    |                    |                    |                    |
|--------------------------------------|--------------------|--------------------|--------------------|--------------------|--------------------|--------------------|
| Na                                   | Mg                 | Al                 | Si                 | P                  | S                  | Cl                 |
| d 1 1.0                              | d 1 1.0            | d 1 1.0            | d 1 1.0            | d 1 1.0            | d 1 1.0            | d 1 1.0            |
| 1.09182426 1.0                       | 0.931646755 1.0    | 0.327147582 1.0    | 0.477131273 1.0    | 0.635440915 1.0    | 0.764482627 1.0    | 1.012950600 1.0    |
| d 1 1.0                              | d 1 1.0            | d 1 1.0            | d 1 1.0            | d 1 1.0            | d 1 1.0            | d 1 1.0            |
| 0.584730897 1.0                      | 0.28107661 1.0     | 0.111433639 1.0    | 0.161418218 1.0    | 0.215883232 1.0    | 0.266239039 1.0    | 0.336078867 1.0    |
| f 1 1.0                              | f 1 1.0            | f 1 1.0            | f 1 1.0            | f 1 1.0            | f 1 1.0            | f 1 1.0            |
| 0.19441546 1.0                       | 0.333840821 1.0    | 0.254517453 1.0    | 0.344193839 1.0    | 0.452768845 1.0    | 0.571207012 1.0    | 0.704487390 1.0    |
| pGCHF-3d2f                           |                    |                    |                    |                    |                    |                    |
| Na                                   | Mg                 | Al                 | Si                 | P                  | S                  | Cl                 |
| d 1 1.0                              | d 1 1.0            | d 1 1.0            | d 1 1.0            | d 1 1.0            | d 1 1.0            | d 1 1.0            |
| 1.09182426 1.0                       | 0.931646755 1.0    | 0.889078903 1.0    | 0.97964414 1.0     | 1.17119463 1.0     | 1.64734169 1.0     | 1.84249742 1.0     |
| d 1 1.0                              | d 1 1.0            | d 1 1.0            | d 1 1.0            | d 1 1.0            | d 1 1.0            | d 1 1.0            |
| 0.584730897 1.0                      | 0.28107661 1.0     | 0.281006741 1.0    | 0.297807679 1.0    | 0.393173817 1.0    | 0.556157655 1.0    | 0.667733983 1.0    |
| d 1 1.0                              | d 1 1.0            | d 1 1.0            | d 1 1.0            | d 1 1.0            | d 1 1.0            | d 1 1.0            |
| 0.193148896 1.0                      | 0.0943541977 1.0   | 0.101717936 1.0    | 0.107868274 1.0    | 0.148078849 1.0    | 0.208533285 1.0    | 0.254606906 1.0    |
| f 1 1.0                              | f 1 1.0            | f 1 1.0            | f 1 1.0            | f 1 1.0            | f 1 1.0            | f 1 1.0            |
| 0.583846756 1.0                      | 0.333840821 1.0    | 0.414916298 1.0    | 0.561999803 1.0    | 0.63482418 1.0     | 0.819237322 1.0    | 1.05772972 1.0     |
| f 1 1.0                              | f 1 1.0            | f 1 1.0            | f 1 1.0            | f 1 1.0            | f 1 1.0            | f 1 1.0            |
| 0.08773866 1.0                       | 0.134186367 1.0    | 0.176224365 1.0    | 0.198649753 1.0    | 0.235946343 1.0    | 0.310170358 1.0    | 0.416529867 1.0    |
| pGCHF-3d2f+d                         |                    |                    |                    |                    |                    |                    |
| Na                                   | Mg                 | Al                 | Si                 | P                  | S                  | Cl                 |
| d 1 1.0                              | d 1 1.0            | d 1 1.0            | d 1 1.0            | d 1 1.0            | d 1 1.0            | d 1 1.0            |
| 1.09182426 1.0                       | 1.99863818 1.0     | 0.889078903 1.0    | 0.97964414 1.0     | 1.17119463 1.0     | 1.64734169 1.0     | 1.84249742 1.0     |
| d 1 1.0                              | d 1 1.0            | d 1 1.0            | d 1 1.0            | d 1 1.0            | d 1 1.0            | d 1 1.0            |
| 0.80004565 1.0                       | 0.931646755 1.0    | 0.62374401 1.0     | 0.68934022 1.0     | 0.86628276 1.0     | 1.12051378 1.0     | 0.80012263 1.0     |
| d 1 1.0                              | d 1 1.0            | d 1 1.0            | d 1 1.0            | d 1 1.0            | d 1 1.0            | d 1 1.0            |
| 0.584730897 1.0                      | 0.28107661 1.0     | 0.281006741 1.0    | 0.297807679 1.0    | 0.393173817 1.0    | 0.556157655 1.0    | 0.667733983 1.0    |
| d 1 1.0                              | d 1 1.0            | d 1 1.0            | d 1 1.0            | d 1 1.0            | d 1 1.0            | d 1 1.0            |
| 0.193148896 1.0                      | 0.0943541977 1.0   | 0.101717936 1.0    | 0.107868274 1.0    | 0.148078849 1.0    | 0.208533285 1.0    | 0.254606906 1.0    |
| f 1 1.0                              | f 1 1.0            | f 1 1.0            | f 1 1.0            | f 1 1.0            | f 1 1.0            | f 1 1.0            |
| 0.583846756 1.0                      | 0.333840821 1.0    | 0.414916298 1.0    | 0.561999803 1.0    | 0.63482418 1.0     | 0.819237322 1.0    | 1.05772972 1.0     |
| f 1 1.0                              | f 1 1.0            | f 1 1.0            | f 1 1.0            | f 1 1.0            | f 1 1.0            | f 1 1.0            |
| 0.08773866 1.0                       | 0.134186367 1.0    | 0.176224365 1.0    | 0.198649753 1.0    | 0.235946343 1.0    | 0.310170358 1.0    | 0.416529867 1.0    |
| pGCHF-4d2f                           |                    |                    |                    |                    |                    |                    |
| Na                                   | Mg                 | Al                 | Si                 | P                  | S                  | Cl                 |
| d 1 1.0                              | d 1 1.0            | d 1 1.0            | d 1 1.0            | d 1 1.0            | d 1 1.0            | d 1 1.0            |
| 1.09182426 1.0                       | 0.931646755 1.0    | 3.23658096 1.0     | 0.904553017 1.0    | 1.17119463 1.0     | 3.16925652 1.0     | 4.95310633 1.0     |
| d 1 1.0                              | d 1 1.0            | d 1 1.0            | d 1 1.0            | d 1 1.0            | d 1 1.0            | d 1 1.0            |
| 0.714188392 1.0                      | 0.419053857 1.0    | 0.412467132 1.0    | 0.621886307 1.0    | 0.913497416 1.0    | 0.923015743 1.0    | 1.32077704 1.0     |
| d 1 1.0                              | d 1 1.0            | d 1 1.0            | d 1 1.0            | d 1 1.0            | d 1 1.0            | d 1 1.0            |
| 0.584730897 1.0                      | 0.28107661 1.0     | 0.144817836 1.0    | 0.403477544 1.0    | 0.393173817 1.0    | 0.441537301 1.0    | 0.589743149 1.0    |
| d 1 1.0                              | d 1 1.0            | d 1 1.0            | d 1 1.0            | d 1 1.0            | d 1 1.0            | d 1 1.0            |
| 0.193148896 1.0                      | 0.0943541977 1.0   | 0.0288277721 1.0   | 0.141405216 1.0    | 0.148078849 1.0    | 0.182988886 1.0    | 0.238081911 1.0    |
| f 1 1.0                              | f 1 1.0            | f 1 1.0            | f 1 1.0            | f 1 1.0            | f 1 1.0            | f 1 1.0            |
| 0.583846756 1.0                      | 0.333840821 1.0    | 0.414916298 1.0    | 0.561999803 1.0    | 0.63482418 1.0     | 0.819237322 1.0    | 1.05772972 1.0     |
| f 1 1.0                              | f 1 1.0            | f 1 1.0            | f 1 1.0            | f 1 1.0            | f 1 1.0            | f 1 1.0            |
| 0.08773866 1.0                       | 0.134186367 1.0    | 0.176224365 1.0    | 0.198649753 1.0    | 0.235946343 1.0    | 0.310170358 1.0    | 0.416529867 1.0    |
| pGCHF-4d2f1g <sup>(contracted)</sup> |                    |                    |                    |                    |                    |                    |
| Na                                   | Mg                 | Al                 | Si                 | P                  | S                  | Cl                 |
| d 1 1.0                              | d 1 1.0            | d 1 1.0            | d 1 1.0            | d 1 1.0            | d 1 1.0            | d 1 1.0            |
| 1.09182426 1.0                       | 0.931646755 1.0    | 3.23658096 1.0     | 0.904553017 1.0    | 1.17119463 1.0     | 3.16925652 1.0     | 4.95310633 1.0     |
| d 2 1.0                              | d 2 1.0            | d 2 1.0            | d 2 1.0            | d 2 1.0            | d 2 1.0            | d 2 1.0            |
| 0.714188392 0.1868                   | 0.419053857 0.8629 | 0.412467132 0.3903 | 0.621886307 0.8648 | 0.913497416 0.6429 | 0.923015743 0.3427 | 1.32077704 0.4963  |
| 0.584730897 0.8132                   | 0.28107661 0.1371  | 0.144817836 0.6097 | 0.403477544 0.1352 | 0.393173817 0.3571 | 0.441537301 0.6573 | 0.589743149 0.5037 |
| d 1 1.0                              | d 1 1.0            | d 1 1.0            | d 1 1.0            | d 1 1.0            | d 1 1.0            | d 1 1.0            |
| 0.193148896 1.0                      | 0.0943541977 1.0   | 0.0288277721 1.0   | 0.141405216 1.0    | 0.148078849 1.0    | 0.182988886 1.0    | 0.238081911 1.0    |
| f 2 1.0                              | f 2 1.0            | f 2 1.0            | f 2 1.0            | f 2 1.0            | f 2 1.0            | f 2 1.0            |
| 0.583846756 0.169                    | 0.333840821 0.1695 | 0.414916298 0.4479 | 0.561999803 0.3550 | 0.63482418 0.1400  | 0.81923732 0.1203  | 1.05772972 0.1555  |
| 0.08773866 0.8310                    | 0.134186367 0.8305 | 0.176224365 0.5521 | 0.198649753 0.6450 | 0.235946343 0.8600 | 0.310170358 0.8797 | 0.416529867 0.8445 |
| g 1 1.0                              | g 1 1.0            | g 1 1.0            | g 1 1.0            | g 1 1.0            | g 1 1.0            | g 1 1.0            |
| 0.265625 1.0                         | 0.017484018 1.0    | 0.04371066 1.0     | 0.055563128 1.0    | 0.06413004 1.0     | 0.714049587 1.0    | 0.8263684 1.0      |

### Sl. 3 Geometries, Charge and Multiplicity

| System            | Charge | Multiplicity | Geometry |             |             |             |
|-------------------|--------|--------------|----------|-------------|-------------|-------------|
| Cl                | 0      | 2            | Cl       | 0.00000000  | 0.00000000  | 0.00000000  |
| Al                | 0      | 2            | Al       | 0.00000000  | 0.00000000  | 0.00000000  |
| S                 | 0      | 3            | S        | 0.00000000  | 0.00000000  | 0.00000000  |
| P                 | 0      | 4            | P        | 0.00000000  | 0.00000000  | 0.00000000  |
| Si                | 0      | 3            | Si       | 0.00000000  | 0.00000000  | 0.00000000  |
| Mg                | 0      | 1            | Mg       | 0.00000000  | 0.00000000  | 0.00000000  |
| Na                | 0      | 2            | Na       | 0.00000000  | 0.00000000  | 0.00000000  |
| Al <sub>2</sub>   | 0      | 3            | Al       | 0.00000000  | 0.00000000  | 1.42325100  |
|                   |        |              | Al       | 0.00000000  | 0.00000000  | -1.42325100 |
| AlCl              | 0      | 1            | Al       | 0.00000000  | 0.00000000  | -1.30115800 |
|                   |        |              | Cl       | 0.00000000  | 0.00000000  | 0.99500400  |
| AlCl <sub>3</sub> | 0      | 1            | Al       | 0.00000000  | 0.00000000  | 0.00000000  |
|                   |        |              | Cl       | 0.00000000  | 2.15116400  | 0.00000000  |
|                   |        |              | Cl       | 1.86296300  | -1.07558200 | 0.00000000  |
|                   |        |              | Cl       | -1.86296300 | -1.07558200 | 0.00000000  |
| AlP               | 0      | 3            | Al       | 0.00000000  | 0.00000000  | -1.14990300 |
|                   |        |              | P        | 0.00000000  | 0.00000000  | 0.99658300  |
| AlS               | 0      | 2            | Al       | 0.00000000  | 0.00000000  | -1.17330800 |
|                   |        |              | S        | 0.00000000  | 0.00000000  | 0.95331300  |
| PCl               | 0      | 3            | P        | 2.86600000  | 0.00000000  | 0.00000000  |
|                   |        |              | Cl       | 4.61333048  | 1.00873483  | 0.00000000  |
| Cl <sub>2</sub>   | 0      | 1            | Cl       | 0.00000000  | 0.00000000  | 0.00000000  |
|                   |        |              | Cl       | 0.00000000  | 0.00000000  | 1.98790000  |
| Mg <sub>2</sub>   | 0      | 1            | Mg       | 0.00000000  | 0.00000000  | 0.00000000  |
|                   |        |              | Mg       | 0.00000000  | 0.00000000  | 3.89050000  |
| MgCl              | 0      | 2            | Mg       | 0.00000000  | 0.00000000  | -1.34960200 |
|                   |        |              | Cl       | 0.00000000  | 0.00000000  | 0.95266000  |
| MgCl <sub>2</sub> | 0      | 1            | Mg       | 0.00000000  | 0.00000000  | 0.00000000  |
|                   |        |              | Cl       | 0.00000000  | 0.00000000  | 2.24053900  |
|                   |        |              | Cl       | 0.00000000  | 0.00000000  | -2.24053900 |

Table SI. 3 (cont.)

| System                         | Charge | Multiplicity |    | Geometry    |             |             |
|--------------------------------|--------|--------------|----|-------------|-------------|-------------|
| MgS                            | 0      | 1            | Mg | 0.00000000  | 0.00000000  | -1.26491800 |
|                                |        |              | S  | 0.00000000  | 0.00000000  | 0.94868800  |
| NaCl                           | 0      | 1            | Na | 2.00000000  | 0.00000000  | 0.00000000  |
|                                |        |              | Cl | 4.36080000  | 0.00000000  | 0.00000000  |
| P <sub>2</sub>                 | 0      | 1            | P  | 0.00000000  | 0.00000000  | 0.00000000  |
|                                |        |              | P  | 0.00000000  | 0.00000000  | 1.89340000  |
| P <sub>4</sub>                 | 0      | 1            | P  | 0.83894500  | 0.83894500  | 0.83894500  |
|                                |        |              | P  | -0.83894500 | -0.83894500 | 0.83894500  |
|                                |        |              | P  | 0.83894500  | -0.83894500 | -0.83894500 |
|                                |        |              | P  | -0.83894500 | 0.83894500  | -0.83894500 |
| PCl <sub>3</sub>               | 0      | 1            | P  | 0.00000000  | 0.00000000  | 0.80166700  |
|                                |        |              | Cl | 0.00000000  | 1.99886800  | -0.23578500 |
|                                |        |              | Cl | 1.73107000  | -0.99943400 | -0.23578500 |
|                                |        |              | Cl | -1.73107000 | -0.99943400 | -0.23578500 |
| PCl <sub>5</sub>               | 0      | 1            | P  | 0.00000000  | -0.00000000 | 0.00000000  |
|                                |        |              | Cl | 0.00000000  | 2.05073117  | 0.00000000  |
|                                |        |              | Cl | 1.77598529  | -1.02536558 | 0.00000000  |
|                                |        |              | Cl | 0.00000000  | -0.00000000 | 2.16025500  |
|                                |        |              | Cl | -1.77598529 | -1.02536559 | 0.00000000  |
| S <sub>2</sub>                 | 0      | 3            | S  | 0.00000000  | 0.00000000  | 0.00000000  |
|                                |        |              | S  | 0.00000000  | 0.00000000  | 1.88920000  |
| S <sub>2</sub> Cl <sub>2</sub> | 0      | 1            | S  | 0.50893600  | 0.94758900  | 0.80695200  |
|                                |        |              | S  | -0.50893600 | -0.94758900 | 0.80695200  |
|                                |        |              | Cl | -0.50893600 | 2.25720600  | -0.75948400 |
|                                |        |              | Cl | 0.50893600  | -2.25720600 | -0.75948400 |
| S <sub>3</sub>                 | 0      | 1            | S  | 0.00000000  | 0.00000000  | 0.75304300  |
|                                |        |              | S  | 0.00000000  | 1.79089500  | -0.37652100 |
|                                |        |              | S  | 0.00000000  | -1.79089500 | -0.37652100 |
| SCl                            | 0      | 2            | S  | 0.00000000  | 0.00000000  | -1.13260800 |
|                                |        |              | Cl | 0.00000000  | 0.00000000  | 1.06598400  |
| SiCl <sub>2</sub>              | 0      | 1            | Si | 0.00000000  | 0.00000000  | 1.00907300  |
|                                |        |              | Cl | 0.00000000  | 1.74158500  | -0.41550100 |
|                                |        |              | Cl | 0.00000000  | -1.74158500 | -0.41550100 |
| SCl <sub>2</sub>               | 0      | 1            | S  | 0.00000000  | 0.00000000  | 0.94220120  |
|                                |        |              | Cl | 0.00000000  | 1.75094300  | -0.44338880 |
|                                |        |              | Cl | 0.00000000  | -1.75094300 | -0.44338880 |
| Si <sub>2</sub>                | 0      | 3            | Si | 0.00000000  | 0.00000000  | 0.00000000  |
|                                |        |              | Si | 0.00000000  | 0.00000000  | 2.24600000  |

Table SI. 3 (cont.)

| System | Charge | Multiplicity | Geometry |             |             |             |
|--------|--------|--------------|----------|-------------|-------------|-------------|
| SiCl   | 0      | 2            | Si       | 0.00000000  | 0.00000000  | 1.09677419  |
|        |        |              | Cl       | 0.00000000  | 0.00000000  | -0.90322581 |
| SiP    | 0      | 2            | Si       | 0.54701847  | 0.73426572  | 0.00000000  |
|        |        |              | P        | -1.53048153 | 0.73426572  | 0.00000000  |
| SiS    | 0      | 1            | Si       | -0.00000000 | -0.00000000 | -1.02896000 |
|        |        |              | S        | -0.00000000 | -0.00000000 | 0.90034000  |

## SI. 4 Total Energies

Table SI. 4 - Total energies calculated using the M062X exchange–correlation functional with the pGCHF, pcseg-3, Sapporo-QZP, and def2-QZVP basis sets.

| Molecules         | symmetry        | pGCHF<br>3d2f+d |              | pGCHF<br>4d2f |              | pGCHF<br>3d2f1g |              | pGCHF<br>4d2f1g (not contracted) |              | pGCHF<br>4d2f1g (contracted) |              | pcseg-3      |              | def2-QZVP    |              | Sapporo-QZP  |              |
|-------------------|-----------------|-----------------|--------------|---------------|--------------|-----------------|--------------|----------------------------------|--------------|------------------------------|--------------|--------------|--------------|--------------|--------------|--------------|--------------|
|                   |                 | Total Energy    | CPU time (s) | Total Energy  | CPU time (s) | Total Energy    | CPU time (s) | Total Energy                     | CPU time (s) | Total Energy                 | CPU time (s) | Total Energy | CPU time (s) | Total Energy | CPU time (s) | Total Energy | CPU time (s) |
| (Eh)              |                 |                 |              |               |              |                 |              |                                  |              |                              |              |              |              |              |              |              |              |
| Al <sub>2</sub>   | D <sub>∞h</sub> | -484.75736      | 48.1         | -484.75724    | 48.7         | -484.75716      | 104.3        | -484.75727                       | 97.8         | -484.75664                   | 90.9         | -484.75542   | 67.4         | -484.75623   | 85.8         | -484.73614   | 78.7         |
| AlCl              | C <sub>∞v</sub> | -702.69517      | 82.9         | -702.69540    | 82.5         | -702.69514      | 138.7        | -702.69545                       | 168.9        | -702.69521                   | 121.3        | -702.69430   | 108.6        | -702.69529   | 124.8        | -702.66864   | 130.5        |
| AlCl <sub>3</sub> | D <sub>3h</sub> | -1623.28745     | 174.3        | -1623.28850   | 172.4        | -1623.28745     | 279.1        | -1623.28870                      | 331.9        | -1623.28792                  | 226.4        | -1623.28613  | 205.8        | -1623.28898  | 250.5        | -1623.22914  | 267.7        |
| AlP               | C <sub>∞v</sub> | -583.69340      | 128.5        | -583.69342    | 131.6        | -583.69329      | 215.1        | -583.69344                       | 262.5        | -583.69317                   | 174          | -583.69163   | 174.5        | -583.69212   | 212.4        | -583.66923   | 191.8        |
| AlS               | C <sub>∞v</sub> | -640.61755      | 123.4        | -640.61784    | 123          | -640.61759      | 207.6        | -640.61794                       | 246.5        | -640.61471                   | 200.4        | -640.61666   | 168.1        | -640.61734   | 200.5        | -640.59222   | 180.3        |
| PCl               | C <sub>∞v</sub> | -801.53106      | 113.6        | -801.53146    | 110          | -801.53102      | 186.3        | -801.53165                       | 221.1        | -801.53072                   | 159          | -801.52977   | 140.8        | -801.53106   | 164.3        | -801.50153   | 158.3        |
| Cl <sub>2</sub>   | D <sub>∞h</sub> | -920.38977      | 40.6         | -920.39069    | 28.2         | -920.38968      | 70.8         | -920.39113                       | 83.1         | -920.39010                   | 46.5         | -920.38931   | 55.4         | -920.39104   | 62.3         | -920.35746   | 30.9         |
| Na <sub>2</sub>   | D <sub>∞h</sub> | -324.54629      | 40.2         | -324.546286   | 42.3         | -324.546281     | 75.1         | -324.54629                       | 93.2         | -324.54626                   | 74.4         | -324.54376   | 7.8          | -324.54096   | 13.0         | -324.53408   | 98.5         |
| Mg <sub>2</sub>   | D <sub>∞h</sub> | -400.12651      | 37.7         | -400.12653    | 39           | -400.12655      | 63.6         | -400.12658                       | 77.1         | -400.12651                   | 61.8         | -400.12658   | 12           | -400.12211   | 15.1         | -400.11354   | 93.2         |
| MgCl              | C <sub>∞v</sub> | -660.33081      | 132.7        | -660.33087    | 136.1        | -660.33055      | 214          | -660.33090                       | 270.5        | -660.32975                   | 185.6        | -660.32979   | 73.1         | -660.32949   | 105.1        | -660.30886   | 228          |
| MgCl <sub>2</sub> | D <sub>∞h</sub> | -1120.65171     | 125.3        | -1120.65191   | 126.4        | -1120.65131     | 201.2        | -1120.65196                      | 248.3        | -1120.65068                  | 175.8        | -1120.64877  | 87.6         | -1120.65029  | 124.1        | -1120.61319  | 239.5        |
| MgS               | C <sub>∞v</sub> | -598.24061      | 84.1         | -598.24158    | 85.5         | -598.24025      | 139.3        | -598.24169                       | 164.5        | -598.23934                   | 121.9        | -598.24308   | 23.1         | -598.24253   | 81.9         | -598.22367   | 187.8        |
| P <sub>2</sub>    | D <sub>∞h</sub> | -682.69569      | 41.1         | -682.69569    | 41           | -682.69562      | 68.6         | -682.69569                       | 82.9         | -682.69495                   | 63.4         | -682.69560   | 62.7         | -682.69586   | 69.6         | -682.66965   | 77.4         |

Table SI 4 Total Energy (cont.)

| Molecules                      | symmetry        | pGCHF<br>3d2f+d |               | pGCHF<br>4d2f |              | pGCHF<br>3d2f1g |               | pGCHF<br>4d2f1g (not contracted) |               | pGCHF<br>4d2f1g(contraction) |               | pcseg-3      |               | def2-QZVP    |               | Sapporo-QZP  |               |
|--------------------------------|-----------------|-----------------|---------------|---------------|--------------|-----------------|---------------|----------------------------------|---------------|------------------------------|---------------|--------------|---------------|--------------|---------------|--------------|---------------|
|                                |                 | Total Energy    | CPU time (s)  | Total Energy  | CPU time (s) | Total Energy    | CPU time (s)  | Total Energy                     | CPU time (s)  | Total Energy                 | CPU time (s)  | Total Energy | CPU time (s)  | Total Energy | CPU time (s)  | Total Energy | CPU time (s)  |
| (Eh)                           |                 |                 |               |               |              |                 |               |                                  |               |                              |               |              |               |              |               |              |               |
| P <sub>4</sub>                 | T <sub>d</sub>  | -1365.49715     | 133.4         | -1365.49720   | 133.3        | -1365.496776    | 207.8         | -1365.49724                      | 244.1         | -1365.49313                  | 178.3         | -1365.49870  | 171.3         | -1365.49829  | 197.5         | -1365.44582  | 166.4         |
| PCl <sub>3</sub>               | C <sub>3v</sub> | -1722.07246     | 389.8         | -1722.07346   | 381.6        | -1722.072357    | 611.6         | -1722.07392                      | 768.2         | -1722.07092                  | 516.2         | -1722.07238  | 465.4         | -1722.07511  | 559.8         | -1722.01159  | 588           |
| PCl <sub>5</sub>               | D <sub>3h</sub> | -2642.48984     | 737           | -2642.48920   | 569.1        | -2642.489532    | 1325.1        | -2642.49232                      | 1361.5        | -2642.48691                  | 1265.5        | -2642.49083  | 798.7         | -2642.49510  | 1032.5        | -2642.39772  | 1086.9        |
| S <sub>2</sub>                 | D <sub>∞h</sub> | -796.38175      | 49.6          | -796.38280    | 50.3         | -796.3820591    | 85.4          | -796.38332                       | 105.2         | -796.38297                   | 75            | -796.38161   | 73.2          | -796.38278   | 85.2          | -796.35292   | 80.4          |
| S <sub>2</sub> Cl <sub>2</sub> | C <sub>2</sub>  | -1716.83030     | 1234.2        | -1716.83253   | 1191.9       | -1716.830681    | 1952.9        | -1716.83364                      | 2597.4        | -1716.83212                  | 1728.5        | -1716.83089  | 1438.3        | -1716.83350  | 1827.1        | -1716.76959  | 1890.9        |
| S <sub>3</sub>                 | C <sub>2v</sub> | -1194.58029     | 311.7         | -1194.58266   | 303.1        | -1194.580896    | 513.6         | -1194.58363                      | 622.5         | -1194.58304                  | 422.9         | -1194.58201  | 407.5         | -1194.58342  | 503.6         | -1194.53765  | 510           |
| SCl                            | C <sub>∞v</sub> | -858.36547      | 179.8         | -858.36631    | 176.5        | -858.3655189    | 302.1         | -858.36676                       | 364.5         | -858.36606                   | 258.4         | -858.36499   | 230.7         | -858.36649   | 217.1         | -858.33481   | 267.1         |
| SiCl <sub>2</sub>              | C <sub>2v</sub> | -1209.98722     | 263.5         | -1209.98780   | 260.3        | -1209.987284    | 424.1         | -1209.98807                      | 508.6         | -1209.98654                  | 357.5         | -1209.98774  | 281.5         | -1209.98954  | 380.8         | -1209.94465  | 340.7         |
| SCl <sub>2</sub>               | C <sub>2v</sub> | -1318.61180     | 277.7         | -1318.61332   | 271.3        | -1318.611936    | 457.9         | -1318.61408                      | 552.2         | -1318.61277                  | 389.9         | -1318.61176  | 342.7         | -1318.61397  | 414.4         | -1318.56526  | 431.7         |
| Si <sub>2</sub>                | D <sub>∞h</sub> | -578.83708      | 60.5          | -578.83719    | 63           | -578.8369554    | 96.8          | -578.83722                       | 124.3         | -578.83673                   | 87.50         | -578.83792   | 74.7          | -578.83855   | 104.3         | -578.81597   | 84            |
| SiCl                           | C <sub>∞v</sub> | -749.67232      | 186.4         | -749.67267    | 175.2        | -749.6722852    | 292.1         | -749.67267                       | 174.9         | -749.67197                   | 251.1         | -749.67251   | 177.4         | -749.67360   | 263.6         | -749.64549   | 199           |
| SiP                            | C <sub>∞v</sub> | -630.74848      | 209.3         | -630.74853    | 209.8        | -630.7483447    | 316.3         | -630.74854                       | 399.8         | -630.74796                   | 266.5         | -630.74889   | 225.6         | -630.74908   | 338           | -630.72478   | 240.8         |
| SiS                            | C <sub>∞v</sub> | -687.70025      | 82.4          | -687.70064    | 84           | -687.7004417    | 137.6         | -687.70086                       | 172.4         | -687.70027                   | 122.9         | -687.70135   | 105           | -687.70181   | 137.4         | -687.67537   | 113.5         |
| <b>Mean CPU time (s)</b>       |                 |                 | <b>203.37</b> |               | <b>193.7</b> |                 | <b>334.12</b> |                                  | <b>397.84</b> |                              | <b>293.14</b> |              | <b>229.96</b> |              | <b>291.18</b> |              | <b>306.23</b> |

## SI.5 Complete Basis Set Limit Extrapolations

The energies at CBS limit were calculated through Karton and Marting's<sup>1</sup> formula:

$$E_{CBS} = E_L + \frac{E_L - E_{L-1}}{\frac{E \exp(9(\sqrt{L} - \sqrt{L-1}))}{L+1} - 1} \quad (\text{SI5.1})$$

To access the accuracy of the basis sets studied in this work energies calculated with Jensen's pcseg-3 and pcseg-4 basis sets were extrapolated by turning the Equation SI4.1 into:

$$E_{CBS_{\text{pcseg-3/pcseg-4}}} = E_4 + \frac{E_4 - E_3}{\frac{4}{5} \exp(9(\sqrt{4} - \sqrt{3})) - 1} \quad (\text{SI5.2})$$

were  $E_3$  and  $E_4$  are the total energies calculated with the pcseg-3 and pcseg-4 uncontracted basis sets respectively, using the exchange–correlation functional M062X.

Following the same pattern previously described, we have also extrapolated energies using Dunning's cc-pVQZ and cc-pV5Z uncontracted basis set through the formula:

$$E_{CBS_{\text{cc-pVQZ/cc-pV5Z}}} = E_5 + \frac{E_5 - E_4}{\frac{5}{6} \exp(9(\sqrt{5} - \sqrt{4})) - 1} \quad (\text{SI5.3})$$

The resultant extrapolated energies are found in Table SI5.1:

**Table SI5.1- Extrapolated energies calculated according to Equations SI5.2 and SI5.3.**

| Molecules                      | $E_{CBS_{\text{pcseg-3/pcseg-4}}}$ | $E_{CBS_{\text{cc-pVQZ/cc-pV5Z}}}$ |
|--------------------------------|------------------------------------|------------------------------------|
| Al <sub>2</sub>                | -484.7646429                       | -484.7613542                       |
| AlCl                           | -702.7024417                       | -702.6995137                       |
| AlCl <sub>3</sub>              | -1623.3026915                      | -1623.296794                       |
| AlP                            | -583.7001572                       | -583.6969097                       |
| AlS                            | -640.6248141                       | -640.6216988                       |
| PCl                            | -801.5387845                       | -801.5356707                       |
| Cl <sub>2</sub>                | -920.3977379                       | -920.3949551                       |
| Na <sub>2</sub>                | -324.5527273                       | -324.5513731                       |
| Mg <sub>2</sub>                | -400.1330793                       | -400.1319339                       |
| MgCl                           | -660.3386073                       | -660.3367233                       |
| MgCl <sub>2</sub>              | -1120.6623143                      | -1120.659066                       |
| MgS                            | -598.2513469                       | -598.2494699                       |
| P <sub>2</sub>                 | -682.7027695                       | -682.6996399                       |
| P <sub>4</sub>                 | -1365.5117890                      | -1365.506113                       |
| PCl <sub>3</sub>               | -1722.0884177                      | -1722.082869                       |
| PCl <sub>5</sub>               | -2642.5150987                      | -2642.506746                       |
| S <sub>2</sub>                 | -796.3897424                       | -796.3869034                       |
| S <sub>2</sub> Cl <sub>2</sub> | -1716.8468845                      | -1716.841231                       |
| S <sub>3</sub>                 | -1194.5937602                      | -1194.589097                       |
| SCl                            | -858.3732612                       | -858.370599                        |
| SiCl <sub>2</sub>              | -1209.9997938                      | -1209.995572                       |
| SCL <sub>2</sub>               | -1318.6240028                      | -1318.619835                       |
| Si <sub>2</sub>                | -578.8559424                       | -578.8516187                       |
| SiCl                           | -749.6809425                       | -749.6779534                       |
| SiP                            | -630.7565451                       | -630.7534103                       |
| SiS                            | -687.7087996                       | -687.7059648                       |

## SI. 6 Atomisation Energies

Table SI. 6 – Atomisation Energies calculated using the M062X exchange–correlation functional with the pGCHF, pcseg-3, Sapporo-QZP and def2-QZVP basis sets and the CBS limits.

| System                                 | pGCHF-<br>2d1f | pGCHF-<br>4d2f1g<br>(contracted) | pGCHF-<br>3d2f | pGCHF-<br>3d2f1g | pGCHF-<br>3d2f+d | pGCHF-<br>4d2f | pGCHF-<br>4d2f1g (not<br>contracted) | Sapporo<br>-QZP | def2-<br>QZVP | pcseg-3     | CBS<br>(cc-pVQZ/cc-pV5Z) | CBS<br>(pcseg-3/pcseg-4) |
|----------------------------------------|----------------|----------------------------------|----------------|------------------|------------------|----------------|--------------------------------------|-----------------|---------------|-------------|--------------------------|--------------------------|
| Al <sub>2</sub> →2Al                   | 33.55          | 34.24                            | 34.53          | 34.32            | 34.20            | 34.54          | 34.34                                | 34.60           | 34.57         | 34.35       | 34.23                    | 34.24                    |
| AlCl→Al+Cl                             | 122.58         | 123.28                           | 123.22         | 123.12           | 123.05           | 123.34         | 123.28                               | 123.61          | 123.65        | 123.84      | 123.28                   | 123.26                   |
| AlCl <sub>3</sub> →Al+3Cl              | 307.32         | 310.01                           | 308.44         | 309.43           | 309.40           | 309.05         | 310.16                               | 309.68          | 309.82        | 310.17      | 310.26                   | 310.46                   |
| AlP→Al+P                               | 54.84          | 55.28                            | 55.51          | 55.43            | 55.38            | 55.57          | 55.50                                | 56.03           | 56.24         | 56.42       | 55.42                    | 55.24                    |
| AlS→Al+S                               | 98.37          | 99.39                            | 99.19          | 99.32            | 99.20            | 99.38          | 99.50                                | 99.45           | 99.78         | 100.04      | 99.36                    | 99.40                    |
| PCl→P+Cl                               | 80.50          | 81.05                            | 81.29          | 81.32            | 81.38            | 81.59          | 81.70                                | 82.20           | 82.54         | 82.74       | 82.10                    | 82.03                    |
| Cl <sub>2</sub> →2Cl                   | 58.34          | 59.78                            | 59.13          | 59.17            | 59.28            | 59.79          | 60.05                                | 59.75           | 60.09         | 60.34       | 60.02                    | 60.12                    |
| Na <sub>2</sub> →2Na                   | 19.97          | 20.01                            | 20.01          | 20.02            | 20.02            | 19.99          | 20.02                                | 20.06           | 20.22         | 20.05       | 20.02                    | 19.81                    |
| Mg <sub>2</sub> →2Mg                   | 0.51           | 0.72                             | 1.22           | 0.75             | 0.72             | 1.23           | 0.76                                 | 1.54            | 1.58          | 1.53        | 1.32                     | 1.24                     |
| MgCl→Mg+Cl                             | 73.50          | 75.23                            | 75.56          | 75.41            | 75.60            | 75.68          | 75.62                                | 76.63           | 76.54         | 76.31       | 76.65                    | 76.61                    |
| MgCl <sub>2</sub> →Mg+2Cl              | 182.79         | 183.77                           | 183.96         | 184.00           | 184.31           | 184.16         | 184.39                               | 184.70          | 184.59        | 183.90      | 185.02                   | 185.01                   |
| MgS→Mg+S                               | 42.12          | 43.83                            | 44.43          | 43.61            | 43.85            | 44.91          | 44.49                                | 47.03           | 47.09         | 49.87       | 46.82                    | 46.70                    |
| P <sub>2</sub> →2P                     | 116.71         | 116.85                           | 117.69         | 118.08           | 118.12           | 117.73         | 118.13                               | 119.38          | 120.16        | 120.69      | 118.77                   | 118.33                   |
| P <sub>4</sub> →4P                     | 298.94         | 298.86                           | 300.77         | 302.38           | 302.61           | 301.05         | 302.68                               | 304.77          | 306.37        | 308.01      | 304.58                   | 303.34                   |
| PCl <sub>3</sub> →P+3Cl                | 233.22         | 234.86                           | 234.64         | 235.65           | 235.81           | 235.41         | 236.59                               | 236.80          | 237.73        | 238.35      | 237.66                   | 237.46                   |
| PCl <sub>5</sub> →P+5Cl                | 307.37         | 311.22                           | 309.79         | 312.07           | 312.41           | 309.70         | 313.76                               | 313.31          | 314.76        | 315.74      | 315.83                   | 315.74                   |
| S <sub>2</sub> →2S                     | 102.26         | 104.35                           | 103.61         | 104.11           | 103.95           | 104.36         | 104.86                               | 104.57          | 105.10        | 105.45      | 104.80                   | 104.79                   |
| S <sub>2</sub> Cl <sub>2</sub> →2S+2Cl | 196.61         | 201.46                           | 198.90         | 200.26           | 200.11           | 200.54         | 202.06                               | 200.83          | 201.98        | 202.75      | 202.08                   | 202.18                   |
| S <sub>3</sub> →3S                     | 156.73         | 162.00                           | 159.83         | 161.07           | 160.73           | 161.50         | 162.73                               | 161.70          | 163.09        | 163.84      | 162.68                   | 162.93                   |
| S <sub>2</sub> Cl→S+Cl                 | 67.73          | 69.29                            | 68.71          | 68.87            | 68.88            | 69.34          | 69.62                                | 69.46           | 69.86         | 70.13       | 69.65                    | 69.60                    |
| SiCl <sub>2</sub> →Si+2Cl              | 207.83         | 208.92                           | 208.80         | 209.13           | 209.10           | 209.13         | 209.54                               | 209.95          | 210.43        | 210.85      | 210.19                   | 210.02                   |
| SiCl <sub>2</sub> →S+2Cl               | 128.67         | 131.70                           | 135.06         | 130.82           | 130.80           | 131.37         | 132.11                               | 131.51          | 132.23        | 132.72      | 132.14                   | 132.21                   |
| Si <sub>2</sub> →2Si                   | 79.93          | 80.15                            | 75.07          | 75.13            | 75.12            | 75.13          | 75.19                                | 75.99           | 76.25         | 76.29       | 80.94                    | 81.32                    |
| SiCl→Si+Cl                             | 103.47         | 104.09                           | 104.15         | 104.15           | 104.16           | 104.35         | 104.32                               | 104.79          | 105.11        | 105.31      | 104.79                   | 104.67                   |
| SiP→Si+P                               | 84.51          | 84.63                            | 85.14          | 85.35            | 85.38            | 85.21          | 85.42                                | 86.39           | 86.85         | 87.29       | 85.91                    | 85.51                    |
| SiS→Si+S                               | 145.39         | 146.60                           | 146.30         | 146.68           | 146.54           | 146.50         | 146.87                               | 147.22          | 147.74        | 148.21      | 147.28                   | 146.99                   |
| <b>RMSD</b>                            | <b>3.30</b>    | <b>1.82</b>                      | <b>1.46</b>    | <b>1.39</b>      | <b>1.32</b>      | <b>1.09</b>    | <b>0.84</b>                          | <b>1.08</b>     | <b>1.32</b>   | <b>1.72</b> |                          |                          |
| CBS <sub>(cc-pVQZ/cc-pV5Z)</sub>       |                |                                  |                |                  |                  |                |                                      |                 |               |             |                          |                          |
| <b>RMSD</b>                            | <b>3.21</b>    | <b>1.62</b>                      | <b>1.39</b>    | <b>1.31</b>      | <b>1.26</b>      | <b>1.00</b>    | <b>0.72</b>                          | <b>1.28</b>     | <b>1.56</b>   | <b>1.96</b> |                          |                          |
| CBS <sub>(pcseg-3/pcseg-4)</sub>       |                |                                  |                |                  |                  |                |                                      |                 |               |             |                          |                          |

## Reference

A. Karton, J. M. L. Martin. *Theor. Chem. Acc.*, 2006, **115**, 330-333.
